# Supplementary material
Source: PubMed Central journal article supplement (PMC3021031)
Supplement: 1013155108_pnas.201013155SI.pdf [file 1013155108_pnas.201013155SI.pdf]

# Supporting Information

Terasaki et al. 10.1073/pnas.1013155108

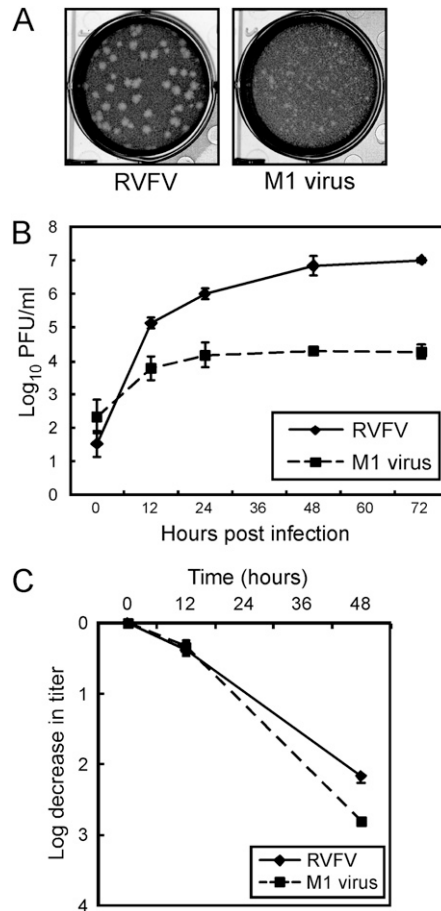

**Fig. S1.** Plaque phenotypes (A), growth kinetics (B), and the thermal inactivation of the infectivity of RVFV and M1 virus at 42 °C. (A) Vero cells were infected with the MP-12 strain of RVFV or M1 virus. After virus adsorption for 1 h, cells were overlaid by media containing 0.45% Noble agar, Dulbecco's modified eagle medium, 10% tryptose phosphate broth, and 10% FBS. Plaques were stained with neutral red at 3 d p.i. (B) Vero cells were infected with RVFV and M1 virus at a multiplicity of infection (MOI) of 0.01, and the culture supernatants were collected at various times p.i. Virus titers were determined by plaque assays. (C) RVFV and M1 virus were incubated at 42 °C in medium containing Dulbecco's modified eagle medium and 10% FBS. At indicated times of incubation, virus infectivities were determined by plaque assays and the data are expressed as mean  $\pm$  SD of three experiments. The infectivities of both viruses after 12 h incubation had no statistically significant difference, whereas the infectivity of RVFV was statistically higher than that of M1 virus after 48 h incubation ( $P < 0.01$ ; Student's *t* test).

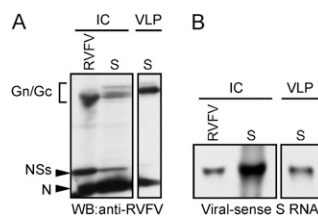

**Fig. S2.** Analysis of S RNA packaging into VLPs. BSR-T7/5 cells were cotransfected with protein expression plasmids, each expressing L protein, N protein and the viral envelope Gn and Gc proteins, and plasmid-expressing antiviral-sense S RNA (S). RVFV, RVFV-infected cells. VLPs, intracellular RNA, and intracellular proteins were collected at 3 d posttransfection. (A) Western blot analysis of virus-specific intracellular proteins (IC) and VLP proteins. (B) Northern blot analysis of virus-specific intracellular RNA (IC) and viral RNA packaged into VLPs by using an RNA probe that hybridizes with viral-sense S RNA.
